# Supplementary material for: A colorimetric and ratiometric fluorescent probe for distinguishing cysteine from biothiols in water and living cells
Source: Royal Society of Chemistry journal article supplement (doi:10.1039/c4ob00463a), 2014-01-01
Supplement: c4ob00463a1.pdf [file c4ob00463a1.pdf]

*Electronic Supplementary Information (ESI)*

**A Merocyanine-based Colorimetric and Fluorescent Probe for Specifically Distinguishing Cysteine from Biothiols in Water and Imaging Application in Living Cells**

Qingxin Han,<sup>a</sup> Zhaohua Shi,<sup>a</sup> Xiaoliang Tang,<sup>a</sup> Lizi Yang,<sup>a</sup> Zuolin Mou,<sup>a</sup> Li Jing,<sup>b</sup> Jinmin Shi,<sup>a</sup> Chunyang Chen,<sup>a</sup> Wei Liu,<sup>a</sup> Huan Yang<sup>a</sup> and Weisheng Liu\*<sup>a</sup>

<sup>a</sup> Key Laboratory of Nonferrous Metals Chemistry and Resources Utilization of Gansu Province and State Key Laboratory of Applied Organic Chemistry, College of Chemistry and Chemical Engineering, Lanzhou University, Lanzhou 730000, P. R. China

<sup>b</sup> School of Pharmacy, Lanzhou University, Lanzhou 730000, P. R. China.

## Table of Contents

1. Synthesis.
2. Limit of detection in analysis.
3. X-ray Diffraction Studies.
4. Distribution Coefficients of Probe 3 in Octanol/Wate.
5. Time-dependent fluorescence spectral and UV-vis spectral changes of probe 3 with Hcy or GSH (**Fig. S1**).
6. HPLC chromatograms of probe 3 and Cys (**Fig. S2**).
7. Fluorescence images of living *Hela* cells incubated at different time (**Fig. S3**)
8. Fluorescence intensity ratio  $R (I_{552}/I_{502})$  of probe 3 and probe 3 with Cys at various pH values (**Fig. S4**).
9. Kinetic studies of probe 3 with Cys, Hcy, and GSH (**Fig. S5**).
10. Time-dependent UV-vis and fluorescence spectral of probe 3 with Cys (**Fig. S6**).
11. The color change of probe 3 in the presence of certain amino acids (**Fig. S7**).
12. Fluorescence spectra of probe 3 with the titration of Cys (**Fig. S8**).
13. Fluorescence spectra of probe 3 with addition of Cys, Hcy and GSH depending on time (**Fig. S9**).
14. Fluorescence spectra of probe 3 with Cys in diluted deproteinized human plasma (**Fig. S10**).
15. Fluorescence spectra study upon excitation at 490 nm (**Fig. S11**).
16. Plot of fluorescence intensity at 483 nm as a function of Cys concentration in diluted deproteinized human plasma (**Fig. S12**).
17. Fluorescence images of living *Hela* cells incubated with various concentrations of probe 3 (**Fig. S13**).
18. Mass spectra (ESI),  $^1\text{H}$  and  $^{13}\text{C}$  NMR spectra (**Fig. S14- Fig. S21**).
19. The retention measurements of probe 3 by HPLC (**Fig. S22- Fig. S23**).

# Experimental

## 1. Synthesis

1.1 *(E)*-2-(4-hydroxystyryl)-1,3,3-trimethyl-3H-indolium iodide (compound **2**) was synthesized according to the literature procedure<sup>[1]</sup>.

<sup>1</sup>H NMR (400 MHz, d<sub>6</sub>-DMSO)  $\delta$  = 1.784 (s, 6H), 4.102 (s, 3H), 6.967 (d,  $J$  = 8.8 Hz, 2H), 7.475 (d,  $J$  = 16.4 Hz, 1H), 7.561–7.638 (m, 2H), 7.843–7.865 (m, 2H), 8.150 (d,  $J$  = 8.4 Hz, 2H), 8.375 (d,  $J$  = 16 Hz, 1H), 10.815 (s, 1H). <sup>13</sup>C NMR (d<sub>6</sub>-DMSO, 100 MHz)  $\delta$  = 25.1, 33.6, 51.2, 108.8, 114.5, 115.9, 122.3, 125.5, 128.2, 128.3, 133.1, 141.3, 142.7, 153.2, 162.7, 180.9. ESI-MS  $m/z$  [(M-I)<sup>+</sup>]: 278.2.

1.2 Synthesis of *(E)*-2-(4-acryloyloxystyryl)-1,3,3-trimethyl-3H-indolium iodide (probe **3**).

To a solution of **2** (132 mg, 0.325 mmol) in 2 mL of DMF, and then added 25 mL of CH<sub>2</sub>Cl<sub>2</sub>. After added anhydrous K<sub>2</sub>CO<sub>3</sub> (45 mg, 325 mmol) and acryloyl chloride (0.2 mL, mixed with 5 mL of CH<sub>2</sub>Cl<sub>2</sub>) the reaction mixture was stirred at 0 °C and warmed to rt overnight. After removal of the insoluble materials by filtration, the filtrate was evaporated. The crude product was purified by chromatography (SiO<sub>2</sub>, CH<sub>2</sub>Cl<sub>2</sub>/MeOH 20:1, v/v) to afford **3** as a orangered solid (106 mg, 75%). <sup>1</sup>H NMR (400 MHz, d<sub>6</sub>-DMSO)  $\delta$  = 1.809 (s, 6H), 4.181 (s, 3H), 6.224 (d,  $J$  = 10.4 Hz, 1H), 6.457 (dd,  $J$  = 17.2 Hz,  $J$  = 10.0 Hz, 1H), 6.598 (d,  $J$  = 17.2 Hz, 1H), 7.459 (d,  $J$  = 8.4 Hz, 2H), 7.561–7.638 (m, 2H), 7.711 (d,  $J$  = 16.4 Hz, 1H), 7.889–7.940 (m, 2H), 8.321 (d,  $J$  = 8.4 Hz, 1H), 8.842 (d,  $J$  = 16.4 Hz, 1H). <sup>13</sup>C NMR (d<sub>6</sub>-DMSO, 100 MHz)  $\delta$  = 24.7, 34.2, 51.8, 112.9, 114.8, 122.1, 122.2, 122.4, 126.8, 128.4, 129.0, 133.8, 141.3, 143.1, 151.2, 153.2, 163.2, 181.3. ESI-MS  $m/z$  [(M-I)<sup>+</sup>]: 332.3.

## 2. Limit of detection in analysis

The limit of detection, expressed as the concentration  $c_L$ , or the quantity  $q_L$ , is derived from the smallest measure  $x_L$ , that can be detected with reasonable certainty for a given analytical procedure. The value of  $x_L$  is given by the equation:

$$x_L = \bar{x}_{bi} + ks_{bi}$$

Where,  $\bar{x}_{bi}$  is the mean of the blank measures,  $s_{bi}$  is the standard deviation of the blank measures, and  $k$  is a numerical factor chosen according to the confidence level desired.

$$c_L = (x_L - \bar{x}_B)/m$$

Where,  $m$  is the slope of the linear regression equation. Combine two of the equations, Long and Winefordner defined  $c_L$ :

$$c_L = (k \cdot s_B)/m \square$$

Generally,  $k=3$ ,  $P < 0.01$ , we obtained  $c_L = 0.5 \mu\text{M}$ .

## 3. X-ray Diffraction Studies.

Single-crystal X-ray diffraction measurements were carried out on a Bruker APEX-II CCD diffractometer operating at 50 KV and 30 mA using Mo  $K\alpha$  radiation ( $\lambda=0.71073\text{\AA}$ ). Data collection and reduction were performed using SMART and SAINT software.<sup>[2]</sup> An empirical absorption correction was applied using the SADABS program.<sup>[3]</sup> The structure was solved by direct methods and refined by full-matrix least-squares on  $F^2$  using the SHELXL-97 program package.<sup>[4]</sup>

Crystal data and details of the structure determination for compound **2** are summarized in Table S1. CCDC 970856 contains the supplementary crystallographic data for this paper. These data can be obtained free of charge from the Cambridge Crystallographic Data Centre via <http://www.ccdc.cam.ac.uk/cgi-bin/catreq.cgi>.

|                |                                                 |
|----------------|-------------------------------------------------|
| Formula        | <a href="#">C<sub>19</sub>H<sub>20</sub>INO</a> |
| Formula Weight | 405.26                                          |
| Crystal System | Orthorhombic                                    |
| Space group    | <i>Pnma</i>                                     |
| <i>a</i> (Å)   | 20.3874 (8)                                     |

|                                            |                                   |
|--------------------------------------------|-----------------------------------|
| $b$ (Å)                                    | 6.9055 (3)                        |
| $c$ (Å)                                    | 12.3088 (5)                       |
| $\alpha$ (°)                               | 90.00                             |
| $\beta$ (°)                                | 90.00                             |
| $\gamma$ (°)                               | 90.00                             |
| $Z$                                        | 4                                 |
| Volume (Å <sup>3</sup> )                   | 1732.90 (12)                      |
| Density (calculated, Mg/m <sup>3</sup> )   | 1.553                             |
| Absorption coefficient (mm <sup>-1</sup> ) | 1.47                              |
| F(000)                                     | 808                               |
| Crystal Size (mm <sup>3</sup> )            | 0.21 × 0.21 × 0.20                |
| Radiation (Å)                              | 0.71073                           |
| Reflections collected                      | 9013                              |
| Independent reflections                    | 1755 ( $R_{\text{int}} = 0.023$ ) |
| Date/restrains/parameters                  | 1755 / 0 / 134                    |
| Final $R$ indices [ $I > 2.0\sigma(I)$ ]   | $R_1 = 0.0311$ , $wR_2 = 0.1247$  |
| $R$ indices (all data)                     | $R_1 = 0.0348$ , $wR_2 = 0.1328$  |
| Goodness-of-fit on $F^2$                   | 1.01                              |

**Table 1.** Crystal Data and Details of the Structure Determination for compound **2**.

#### **4. Distribution Coefficients of Probe 3 in Octanol/Water**

The retention measurements by HPLC were made with a Waters 1525 (Breeze™ HPLC system) equipped with a C<sub>18</sub> reversed phase HPLC column (75 mm × 4.6 mm Symmetry<sup>®</sup> C<sub>18</sub> 3.5 μm) and UV detector (Waters 2998 PDA) set at 384 nm. An injector with 5 μL sample loop was used for the upper and the lower phases sample injections. The mobile phase was CH<sub>3</sub>CN 50% (v/v) in distilled water and the flow rate was 0.5 mL/min.

Partition coefficients of the probe **3** in n-octanol/water system ( $\log P_{\text{o/w}}$ ) were determined by

a conventional shake-flask method. Briefly, probe **3** (10 mg) was dissolved in octanol saturated distilledwater (5 ml) and mixed with water saturated n-octanol (10 ml). The mixture was shaken on 3D shaking-table overnight. The absorbances of the upper and the lower phases showed on any other compound. In order to determine the concentration, the two phases were carefully separated. The Fig. S23-24 shows that the retention time of probe **3** in the water and octanol are appropriate and consistent with each other, peak shape is normal, shows that this method is applicable to the fat water distribution coefficient of determination of the sample. All values correspond to the mean of 3 measurements.

### ***References***

- [1] J. Gu, U.R. Anumala, F. Lo Monte, T. Kramer, R. Heyny von Haussen, J. Holzer, V. Goetschy-Meyer, G. Mall, I.Hilger, C. Czech, B. Schmidt, 2-Styrylindolium based fluorescent probes visualize neurofibrillary tangles in Alzheimer's disease, *Bioorg. Med. Chem. Lett.*, 22 (2012) 7667-7671.
- [2] (a) *SMART*, 5.05 ed.; Bruker AXS, Inc.: Madison, WI, 1998. (b) *Bruker AdVanced X-ray Solutions SAINT*, version 6.45; Bruker AXS, Inc.:Madison, WI, 1997-2003.
- [3] Sheldrick, G. M. *SADABS: Area-Detector Absorption Correction*; University of Göttingen: Göttingen, Germany, 1996.
- [4] Heldrick, G. M. *SHELXL-97, Program for the Refinement of Crystal Structures*; University of Göttingen, Göttingen, Germany, 1997.

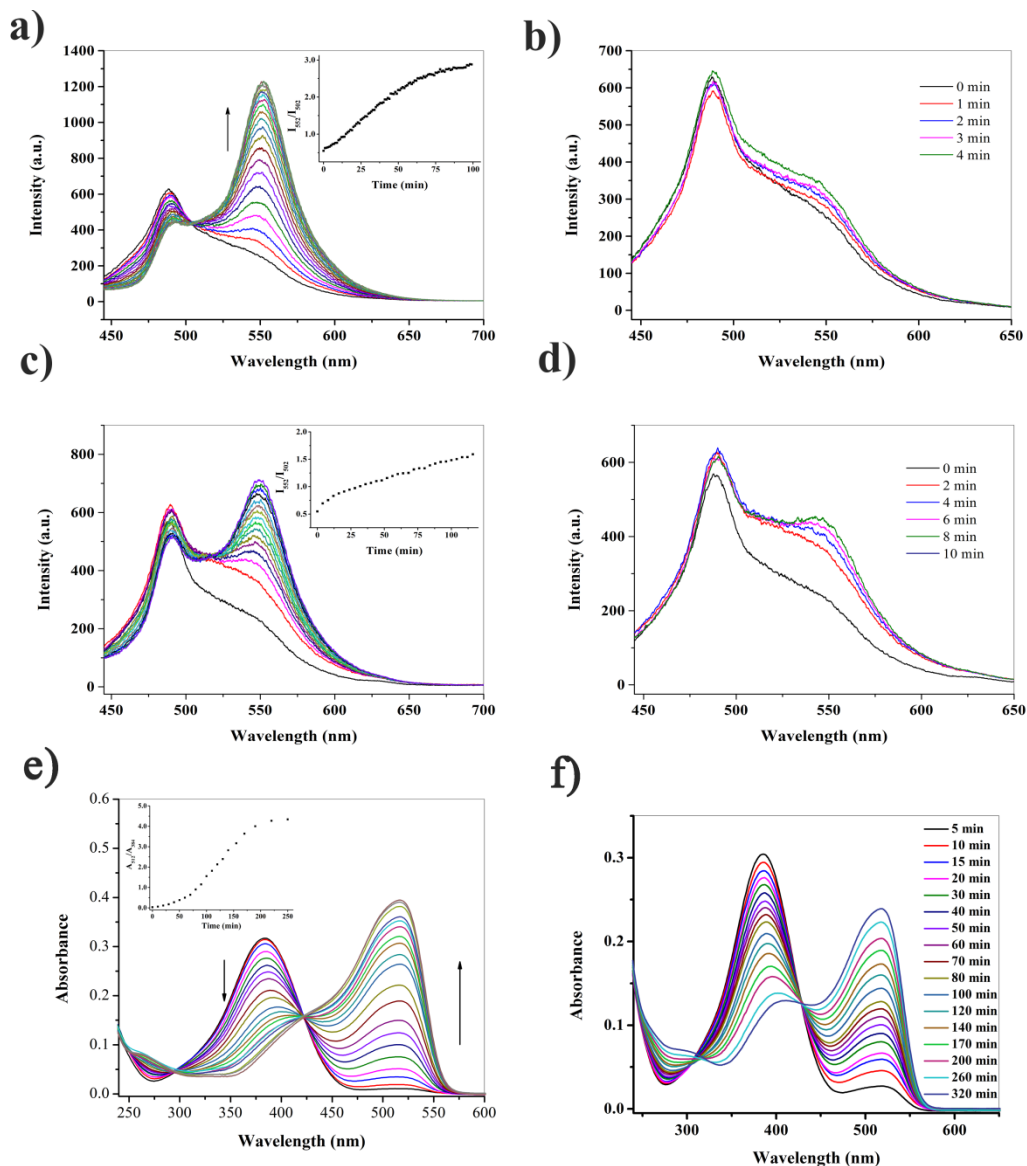

**Fig. S1.** Time-dependent fluorescence spectral and UV-vis spectral changes of probe **3** (10 μM) with Hcy (10 equiv) or GSH (10 equiv) in phosphate buffer (10 mM, pH 7.40). **(a)** Fluorescence spectral of Hcy ( $\lambda_{\text{ex}} = 418$  nm). Inset: Fluorescence intensity ratios  $R (I_{552}/I_{502})$  with addition of 100 μM Hcy depending on time. **(b)** Fluorescence spectral of Hcy within 4 min,  $\lambda_{\text{ex}} = 418$  nm. **(c)** Fluorescence spectral of GSH ( $\lambda_{\text{ex}} = 418$  nm). Inset: Fluorescence intensity ratios  $R (I_{552}/I_{502})$  with addition of 100 μM GSH depending on time. **(d)** Fluorescence spectral of GSH within 10 min,  $\lambda_{\text{ex}} = 418$  nm. **(e)** UV-vis spectral of Hcy. Inset: Absorbance ratio ( $A_{512}/A_{384}$ ) with addition of 100 μM Hcy depending on time. **(f)** UV-vis spectral of GSH. Inset: Absorbance ratio ( $A_{512}/A_{384}$ ) with addition of 100 μM GSH depending on time.

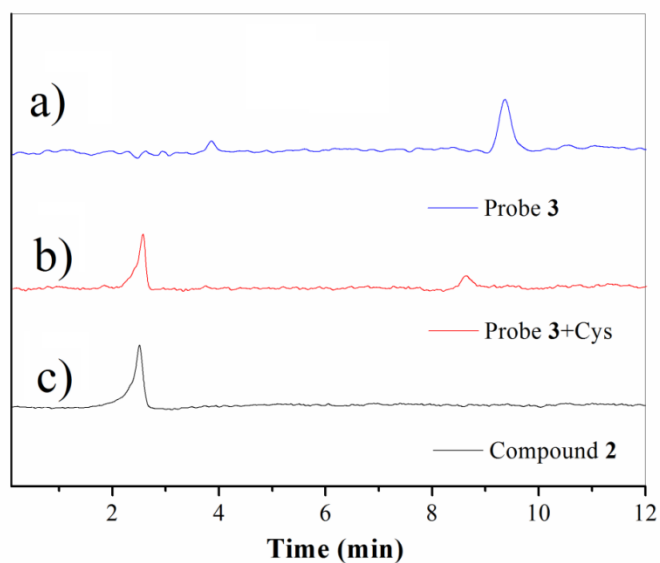

**Fig. S2.** HPLC chromatograms (from highest to lowest) of probe **3** and Cys (a) Before addition of Cys. (b) Reaction mixture after incubation for 15 min at room temperature. (c) Compound **2** prepared as the authentic sample. The reaction was carried out in water. The HPLC gradient was as follows: solvent A (water), solvent B ( $\text{CH}_3\text{CN}$ ); 0-12 min, 80% B. The peaks were monitored by UV absorbance at 490 nm.

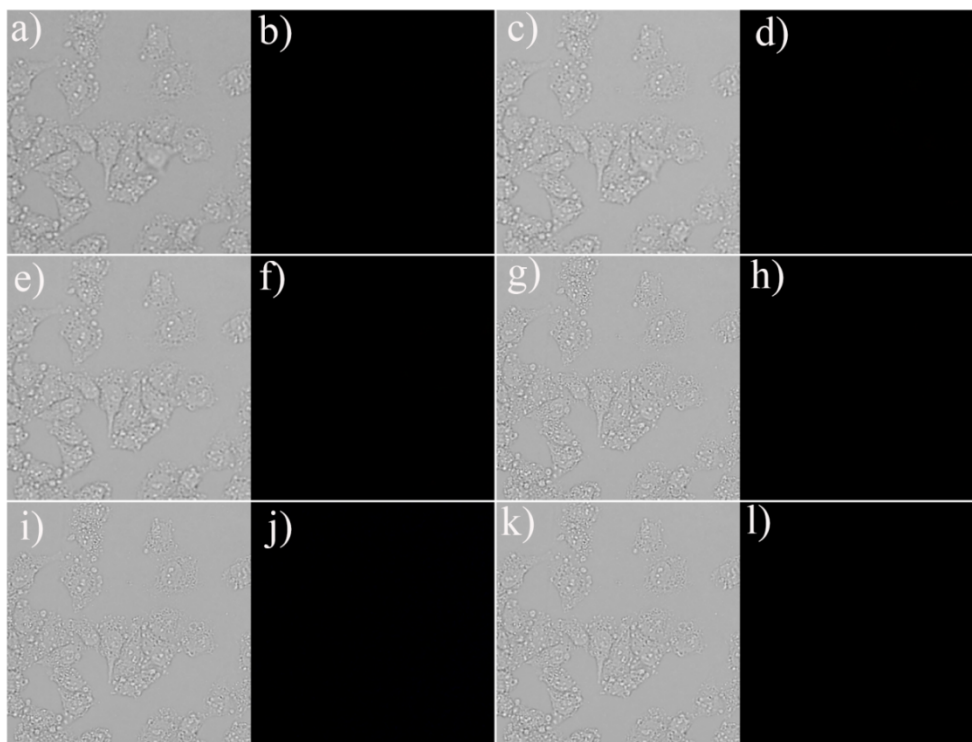

**Fig. S3.** Fluorescence images of living *HeLa* cells incubated at different time. The cells were pretreated with 100  $\mu\text{M}$  N-ethylmaleimide for 1.0 h, and then incubated with 50  $\mu\text{M}$  probe **3**. (a, b) 40 min; (c, d) 40 min; (e, f) 50 min; (g, h) 60 min; (g, h) 70 min; (i, j) 80 min; (k, l) 90 min. Scale bar is 20  $\mu\text{m}$ . Brightfield images (a, c, e, g, i, k), fluorescence images (b, d, f, h, j, l).



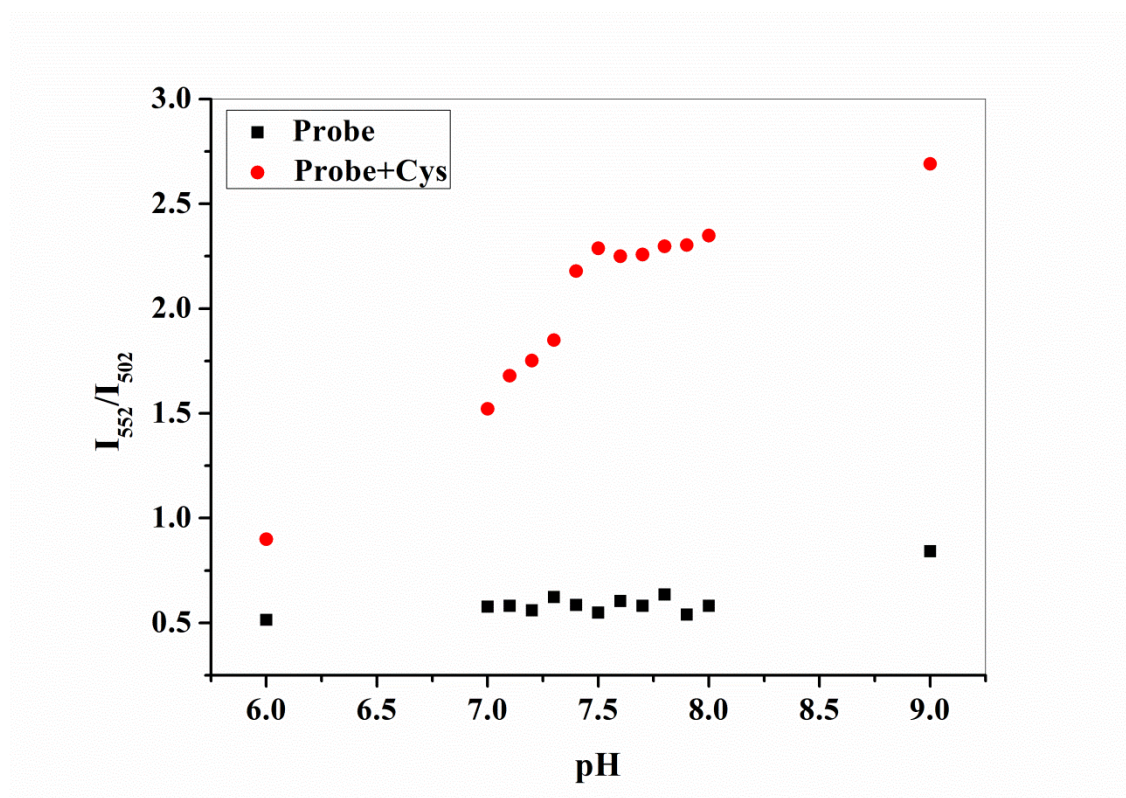

**Fig. S4.** Fluorescence intensity ratio  $R$  ( $I_{552}/I_{502}$ ) of probe **3** (■) and probe **3** (10  $\mu\text{M}$ ) with Cys (0.1 mM) (●) at various pH values. Effect of pH on the Fluorescence intensity ratio  $R$  ( $I_{552}/I_{502}$ ) of probe **3** (■) and probe **3** (10  $\mu\text{M}$ ) with Cys (0.1 mM) after 10 min (●), respectively. The excitation wavelength was 418 nm.

a)

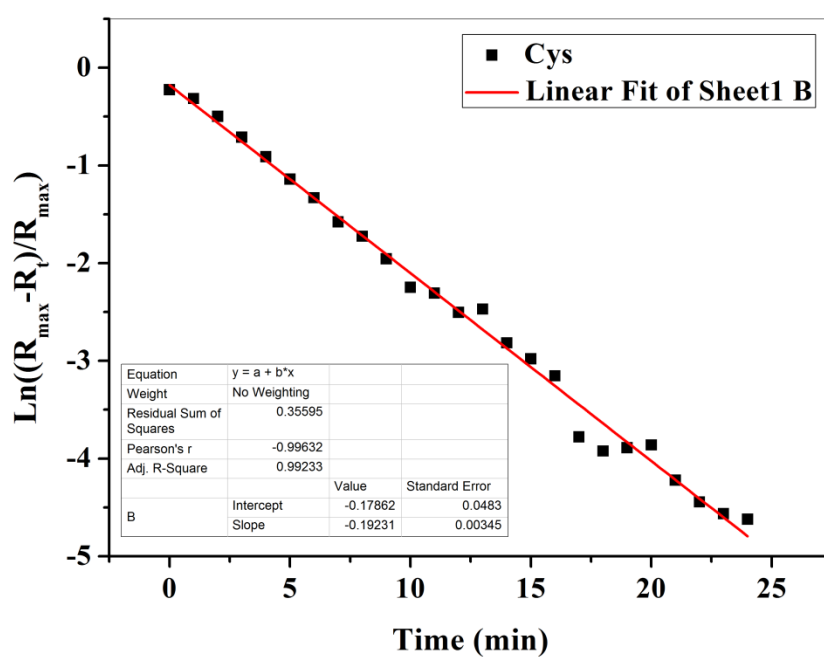

b)

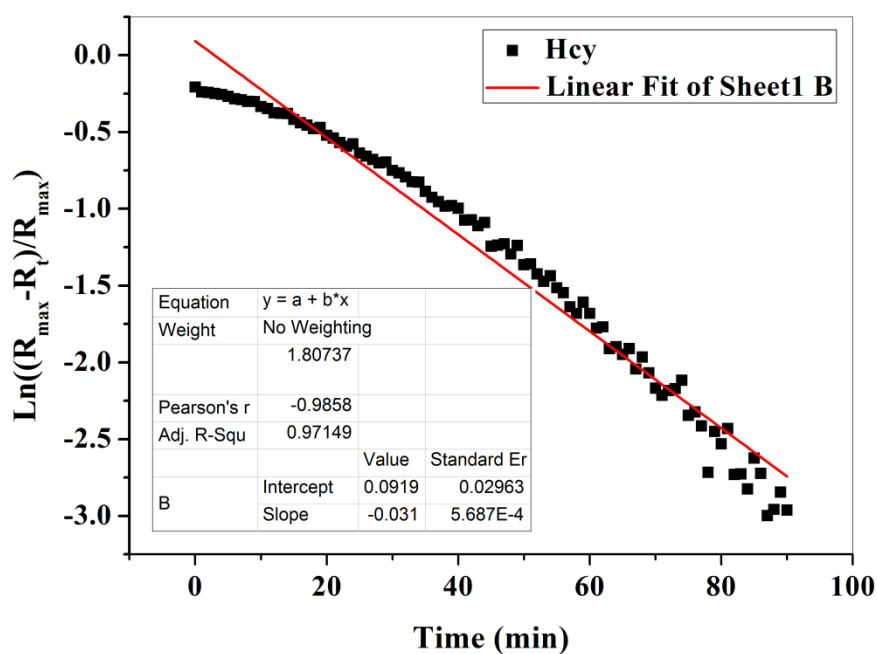

c)

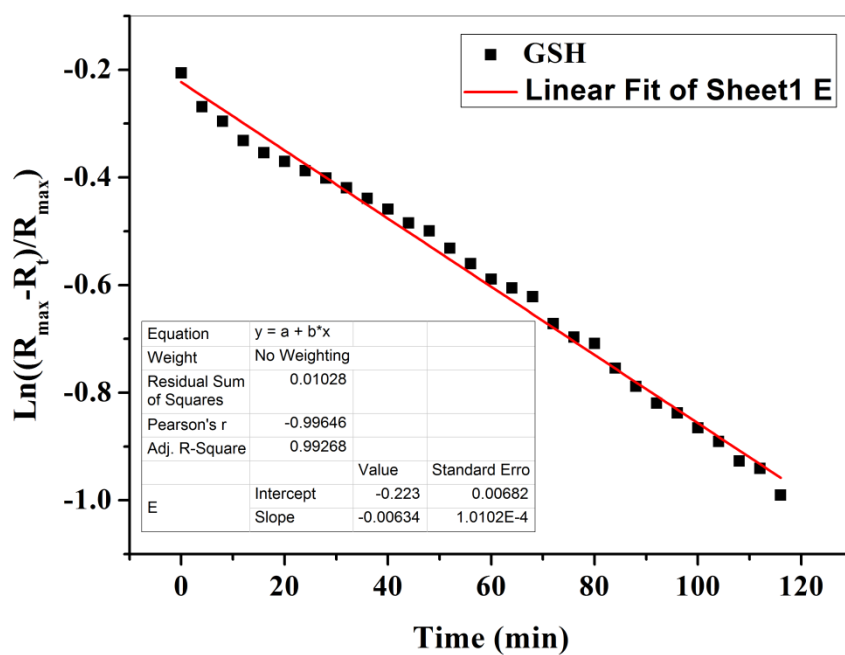

**Fig. S5.** (a) Pseudo first-order kinetic plot of reaction of probe **3** ( $10^{-5}$  M) with Cys ( $10^{-4}$  M), slope = -0.192 so  $k' = -0.192 \text{ min}^{-1}$  and  $k = 3.2 \times 10^3 \text{ M}^{-1}\text{s}^{-1}$ . (b) Pseudo first-order kinetic plot of reaction of probe **3** ( $10^{-5}$  M) with Hcy ( $10^{-4}$  M), slope = -0.031 so  $k' = -0.031 \text{ min}^{-1}$  and  $k = 5.2 \times 10^2 \text{ M}^{-1}\text{s}^{-1}$ . (c) Pseudo first-order kinetic plot of reaction of probe **3** ( $10^{-5}$  M) with GSH ( $10^{-4}$  M), slope = -0.006 so  $k' = -0.006 \text{ min}^{-1}$  and  $k = 1.3 \times 10^2 \text{ M}^{-1}\text{s}^{-1}$ .

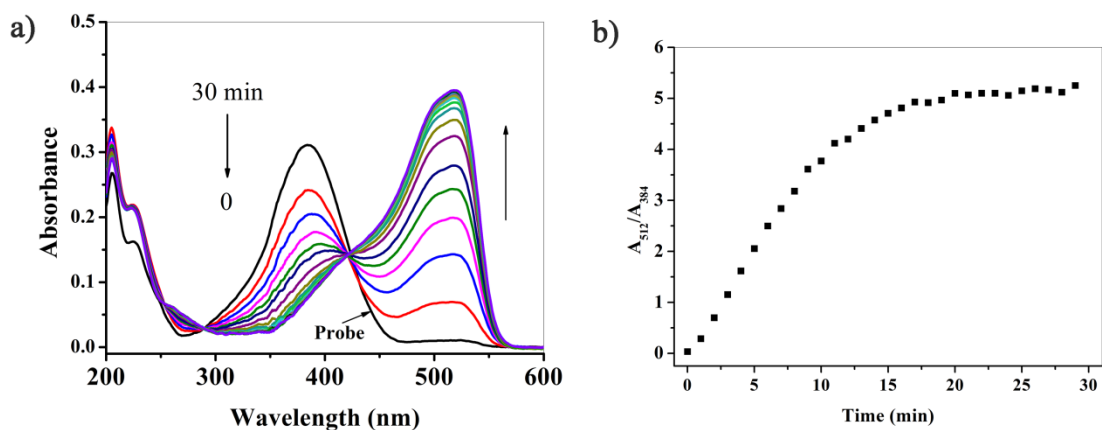

**Fig. S6.** (a) Time-dependent UV-vis spectral changes of probe **3** (10  $\mu\text{M}$ ) with Cys (10 equiv) in phosphate buffer (10 mM, pH 7.4). (b) Absorption spectra of 490 nm with addition of 100  $\mu\text{M}$  Cys depending on time.

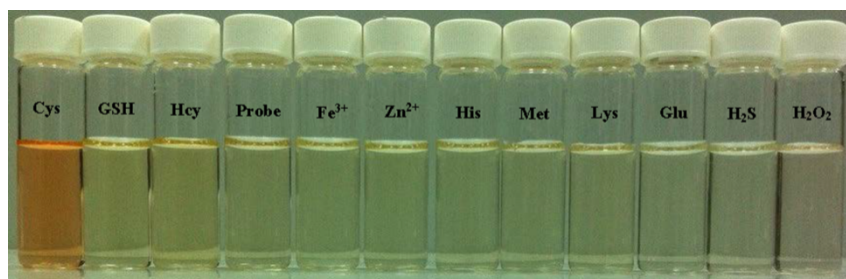

**Fig. S7.** The color change of probe **3** in pH 7.40 of phosphate buffer solution in the presence of 10 equiv. of certain amino acids, important metal ions or redox species at 10 min.

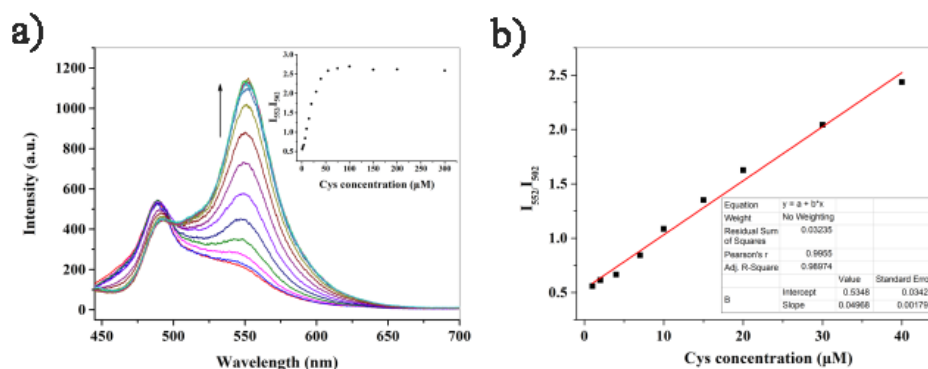

**Fig. S8** (a) Fluorescence spectra of probe **3** (10  $\mu\text{M}$ ) with the titration of Cys (1, 2, 4, 7, 10, 15, 20, 30, 40, 55, 75, 100, 150, 200, 300  $\mu\text{M}$ ) ( $\lambda_{\text{ex}}$ =418 nm) in phosphate buffer (10 mM, pH 7.4). (b) Fluorescence intensity ratio  $R$  ( $I_{552}/I_{502}$ ) changes of probe **3** as a function of concentration Cys (0-40  $\mu\text{M}$ ). Each spectrum was recorded at 10 min after the addition of Cys to probe **3**.

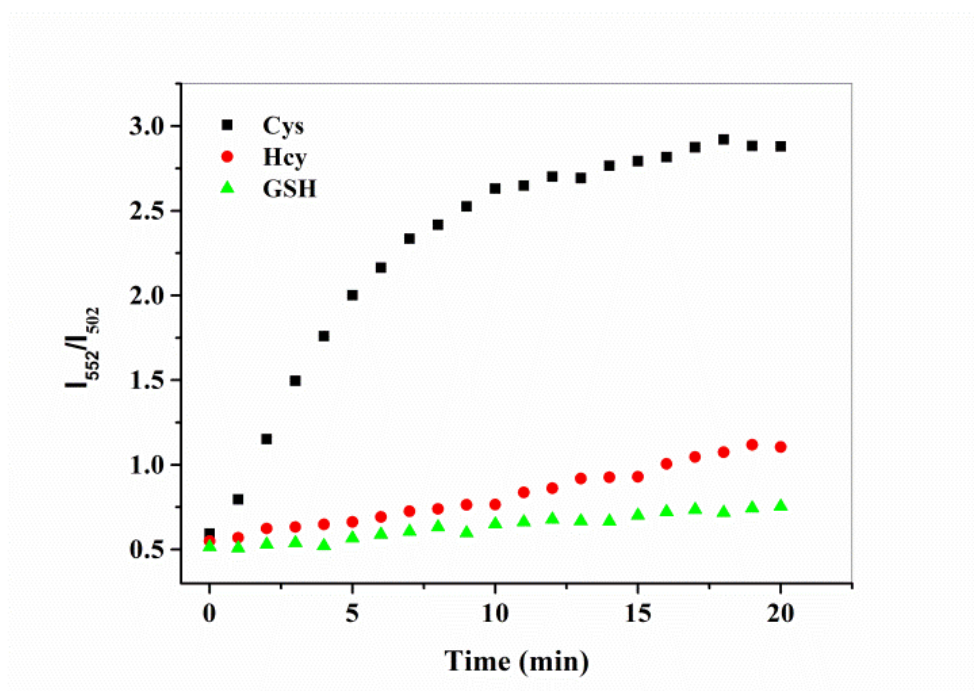

**Fig. S9.** Fluorescence intensity ratio  $R$  ( $I_{552}/I_{502}$ ) changes of probe **3** (10  $\mu\text{M}$ ) with addition of 100  $\mu\text{M}$  Cys, Hcy and GSH depending on time in phosphate buffer (10 mM, pH 7.4).  $\lambda_{\text{ex}} = 418$  nm. The spectrum was recorded at 10 min.

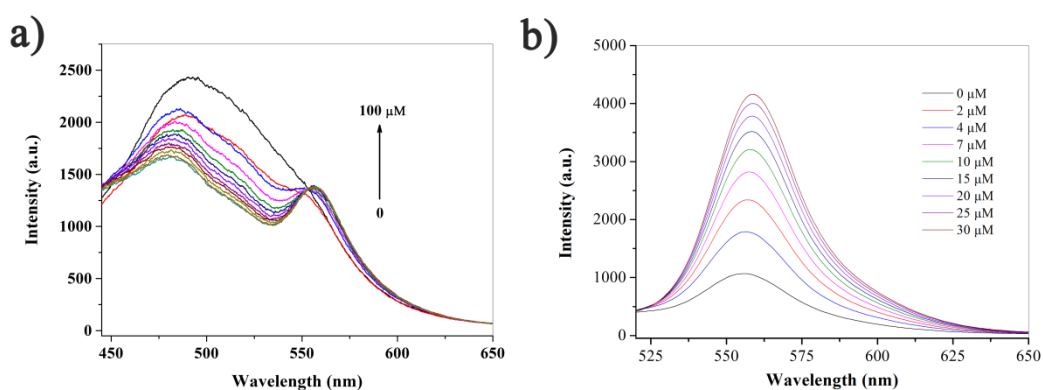

**Fig. S10.** Fluorescence spectra of probe **3** (10  $\mu\text{M}$ ) and Cys (0–40  $\mu\text{M}$ ) in diluted deproteinized human plasma. The plasma was diluted with phosphate buffer (10 mM, pH 7.4) and the reaction monitored at 10 min. **(a)**  $\lambda_{\text{ex}} = 418$  nm. **(b)**  $\lambda_{\text{ex}} = 490$  nm.

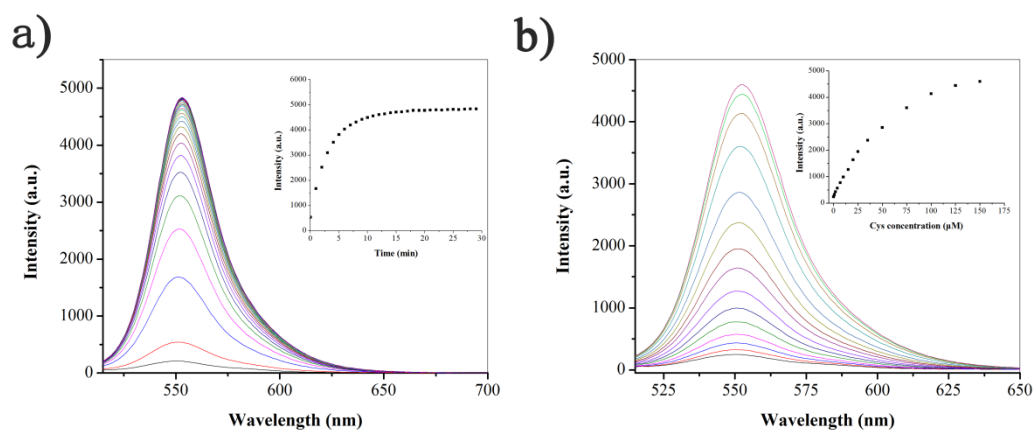

**Fig. S11.** Fluorescence spectra study upon excitation at 490 nm. **(a)** Time-dependent fluorescence spectral changes of probe **3** (10  $\mu$ M) with Cys (10 equiv) in phosphate buffer (10 mM, pH 7.40). Inset: Fluorescence intensity at 552 nm vs time; **(b)** Fluorescence spectra of probe **3** (10  $\mu$ M) with the titration of Cys (1, 2, 4, 7, 10, 15, 20, 35, 50, 75, 100, 125, 150  $\mu$ M) ( $\lambda_{\text{ex}}$ =490 nm) in phosphate buffer (10 mM, pH 7.4). Each spectrum was recorded at 10 min after the addition of Cys to probe **3**.

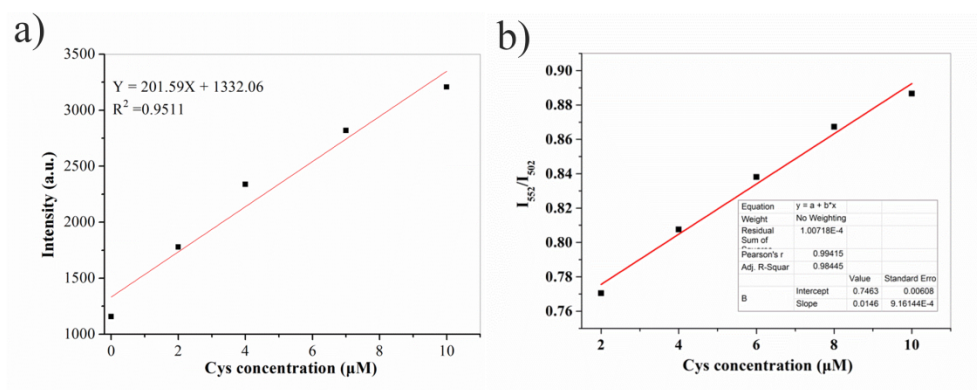

**Fig. S12.** Plot of fluorescence intensity/ intensity ratio as a function of Cys concentration in diluted deproteinized human plasma. Phosphate buffer (10 mM, pH 7.4) was used to dilute the plasma sample and the reaction was monitored at 10 min,  $\lambda_{\text{ex}}$  = 490 nm.

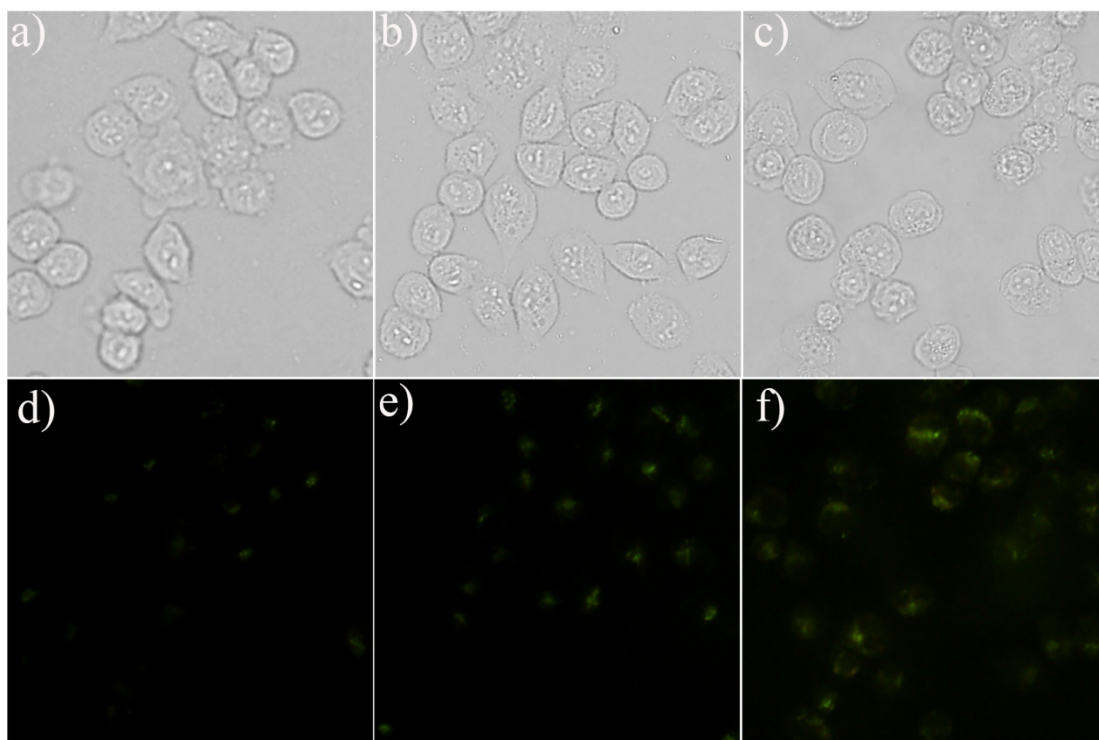

**Fig. S13.** Fluorescence images of living HeLa cells incubated with various concentrations of probe **3**. HeLa cells loaded with probe **3** for 30 min. (**a, d**) 10  $\mu$ M, (**b, e**) 30  $\mu$ M, (**c, f**) 50  $\mu$ M. Scale bar is 20  $\mu$ m. Brightfield images (**a, b, c**), fluorescence images (**d, e, f**).

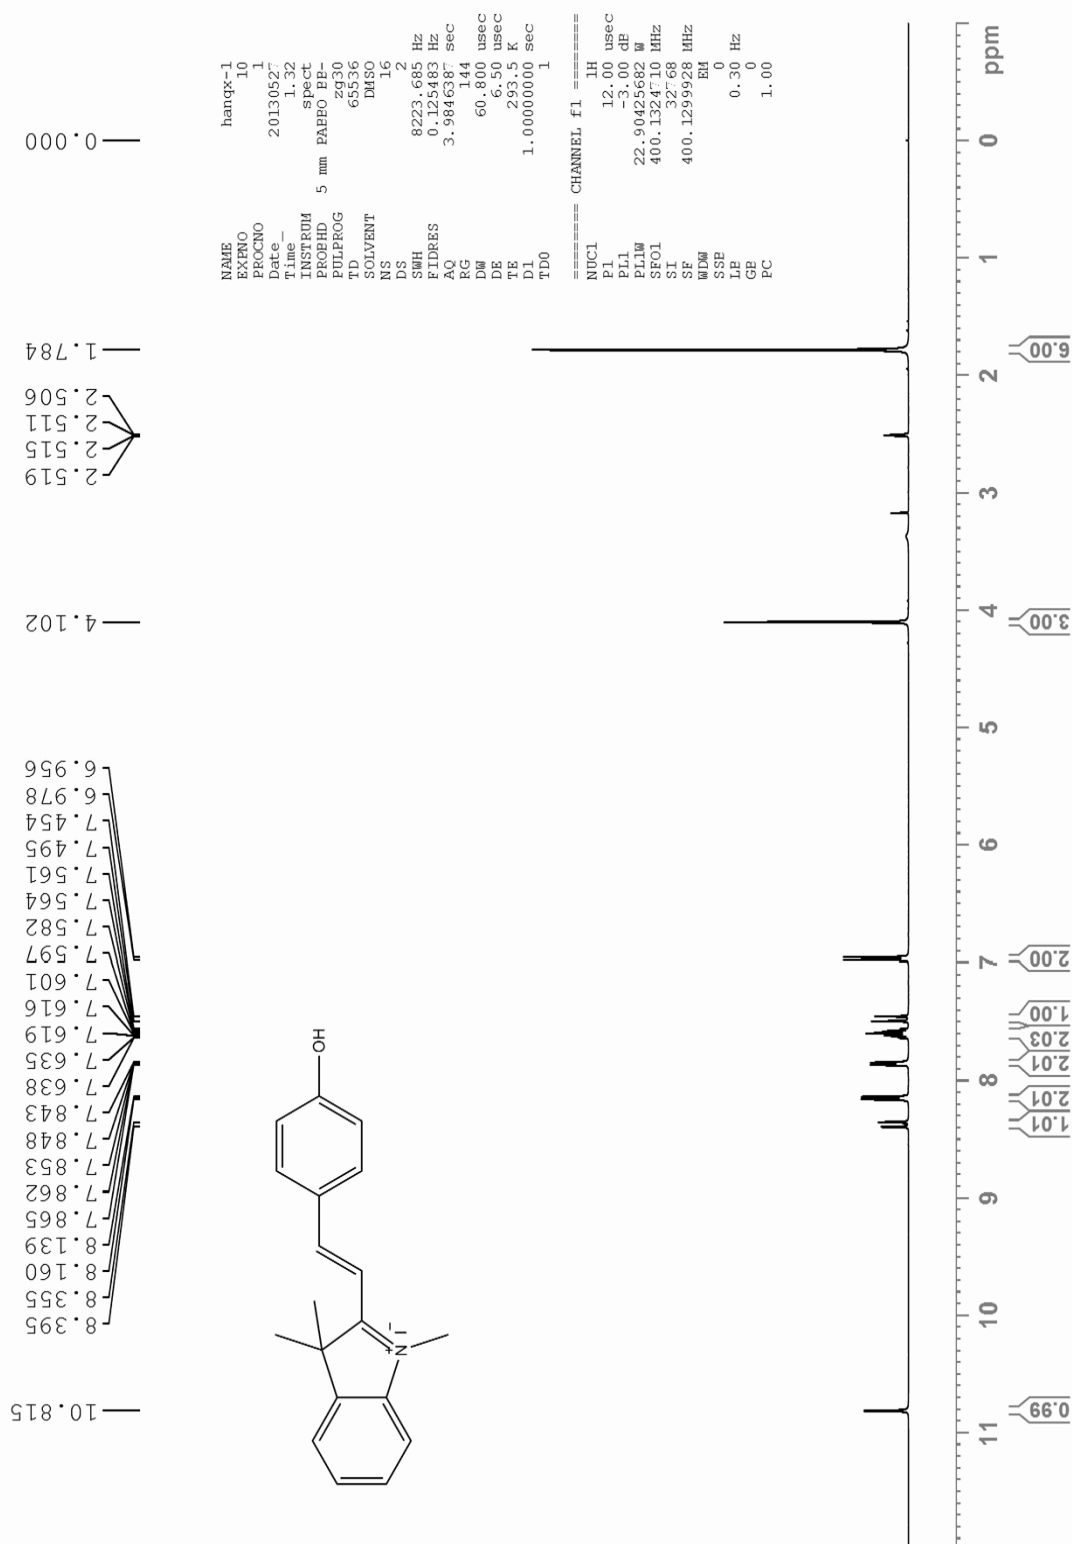

Fig. S14.  $^1\text{H}$  NMR (400 MHz) spectrum of compound **2** in  $\text{d}_6$ -DMSO.

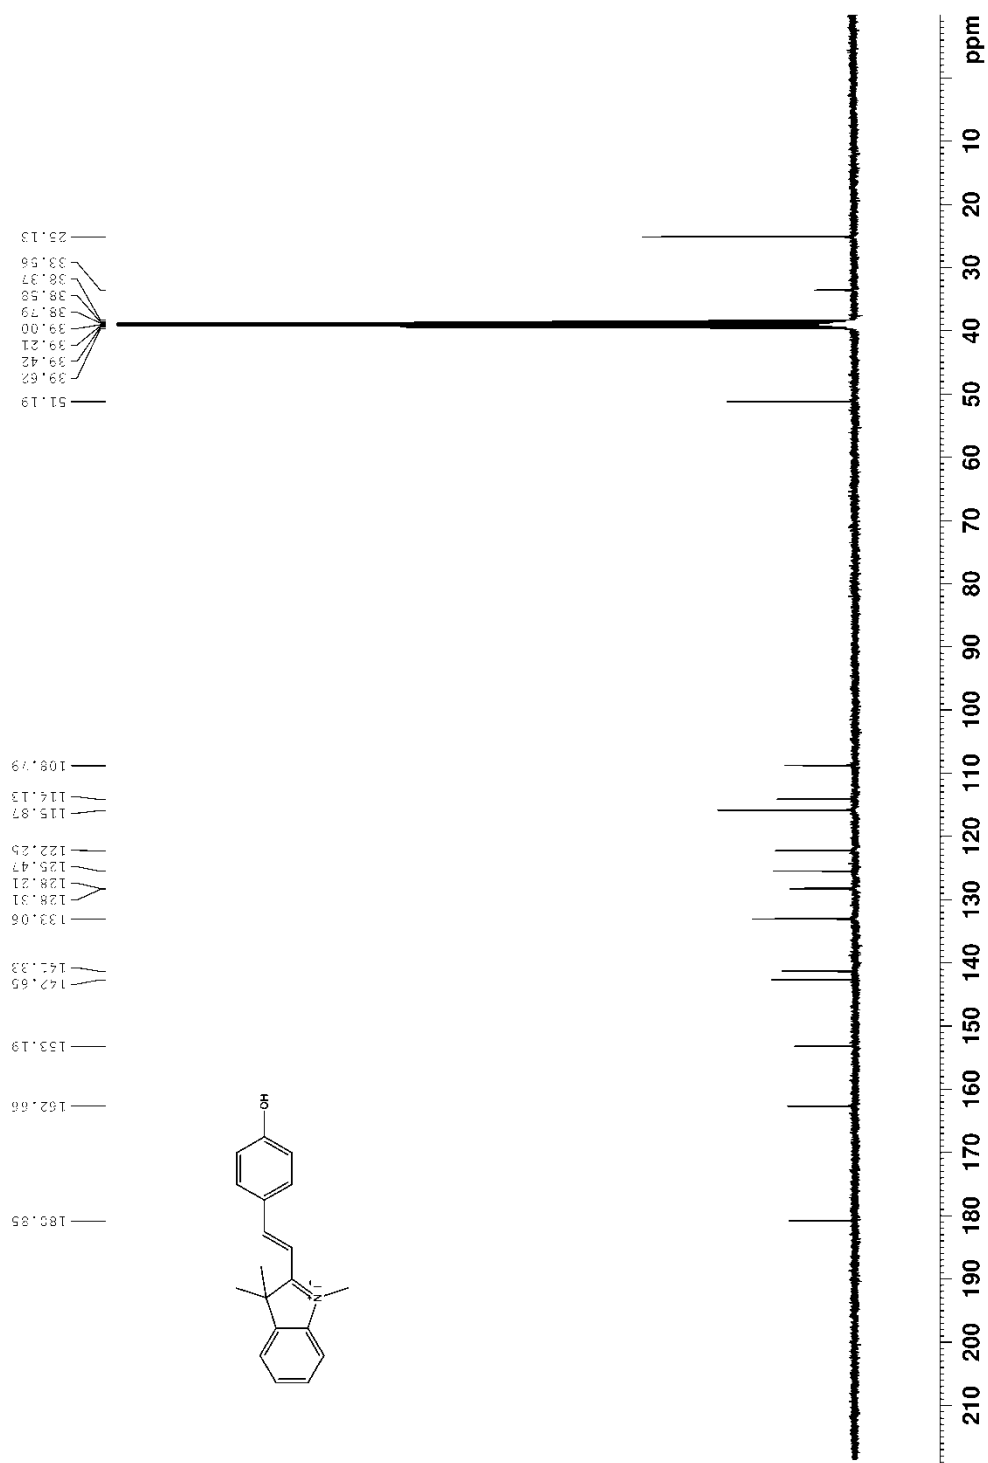

**Fig. S15.**  $^{13}\text{C}$  NMR (100 MHz) spectrum of compound **2** in  $\text{d}_6\text{-DMSO}$ .



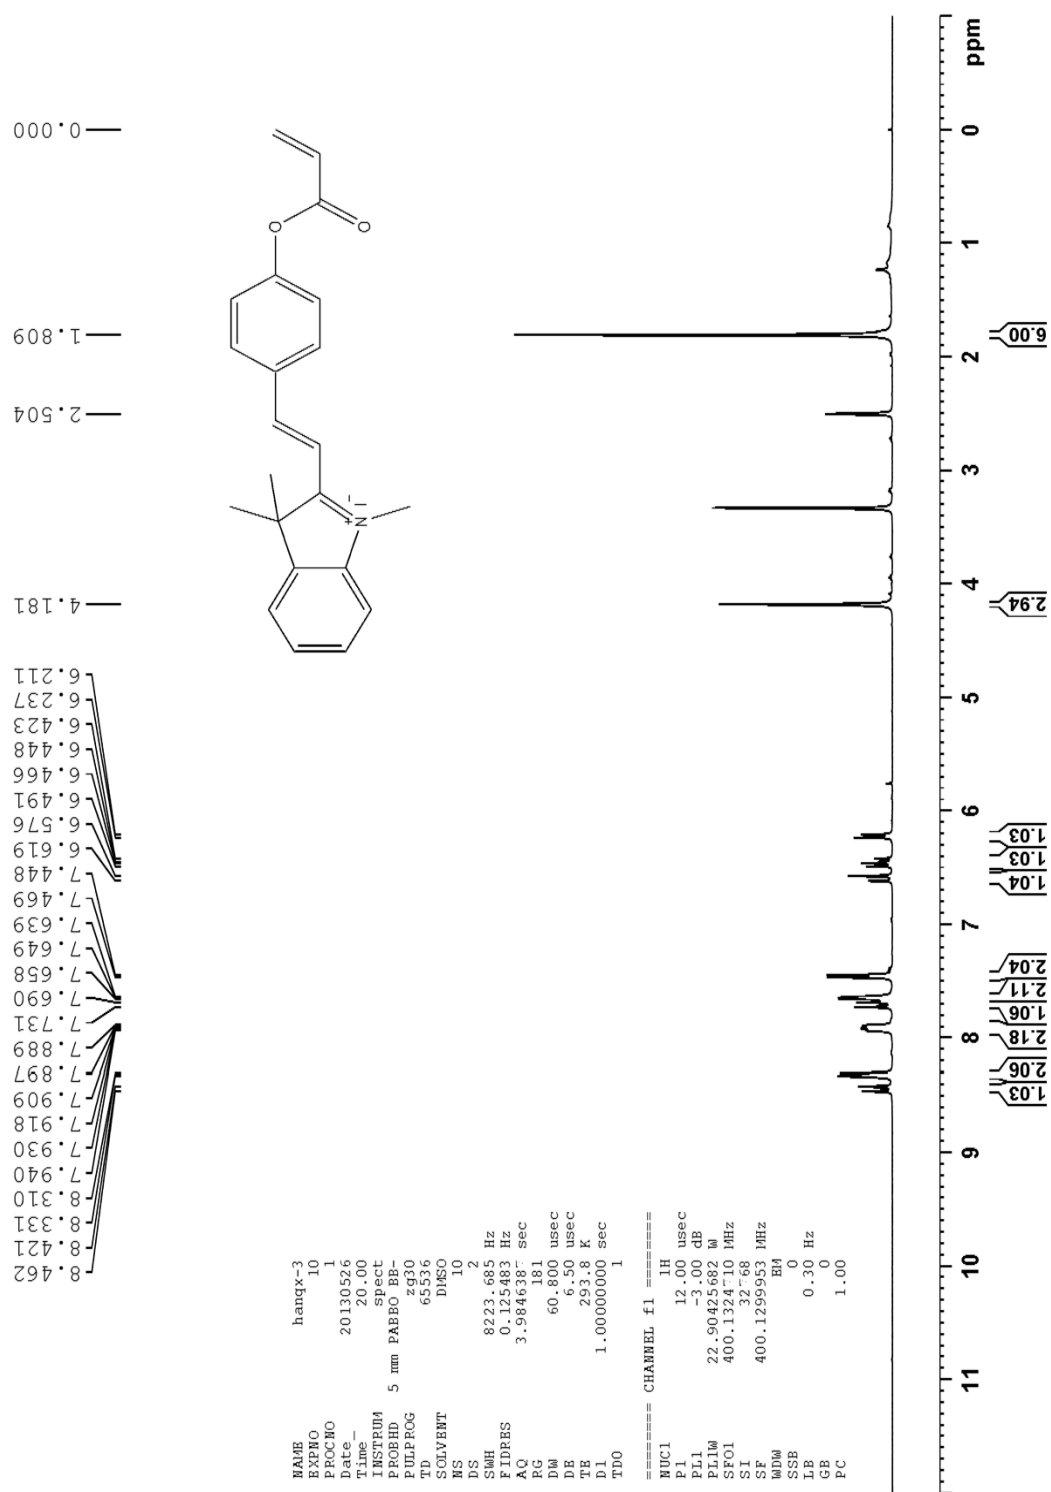

Fig. S16. <sup>1</sup>H NMR (400 MHz) spectrum of probe 3 in d<sub>6</sub>-DMSO.

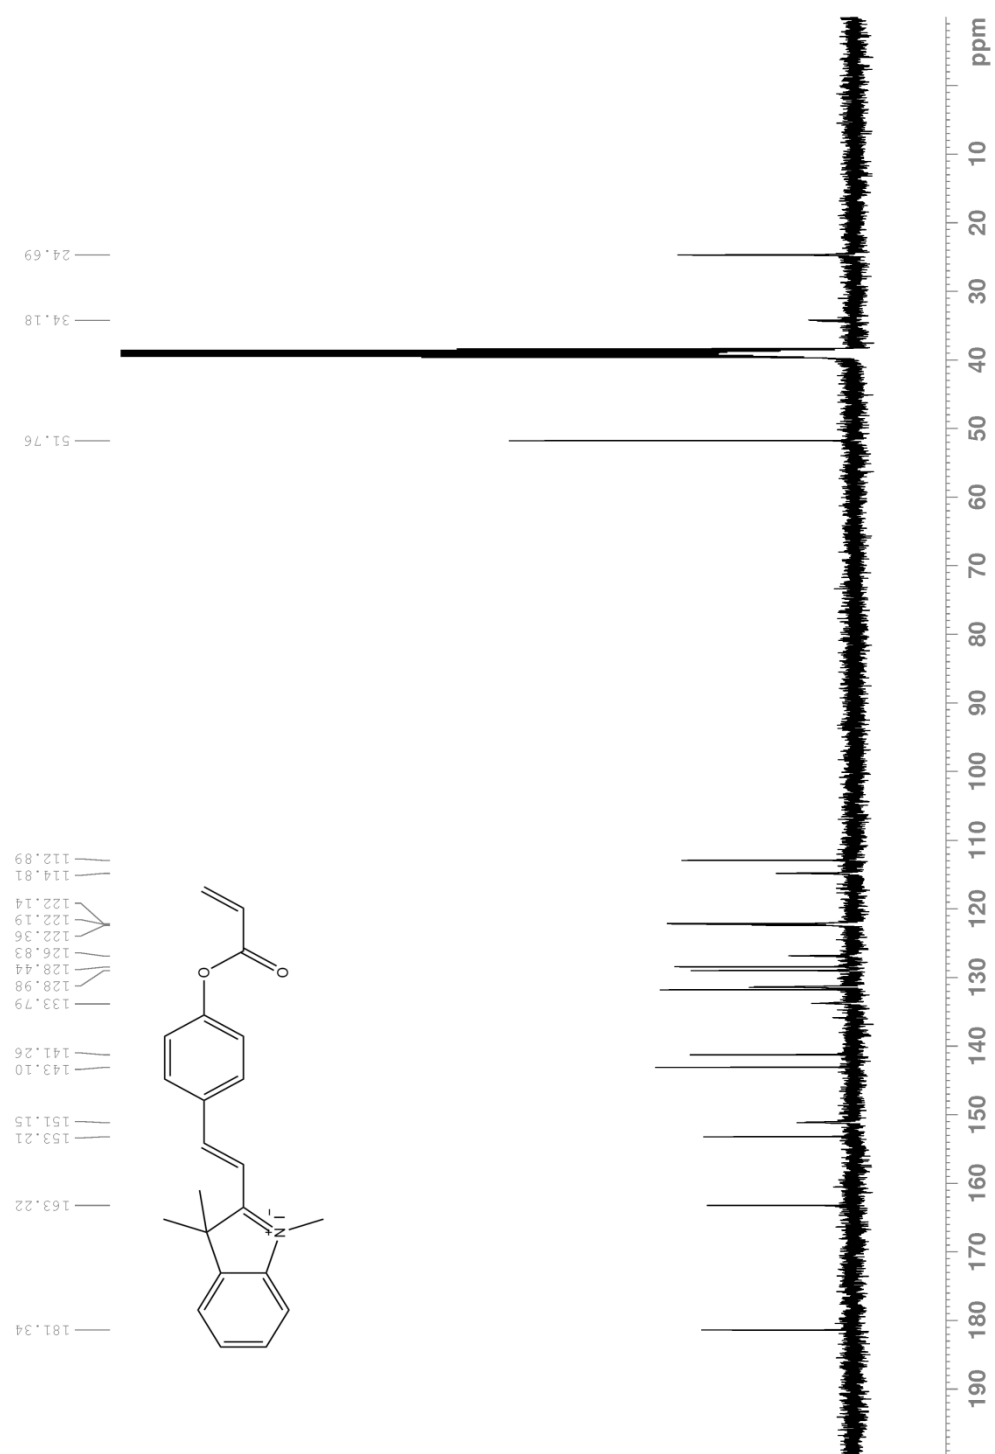

**Fig. S17.** <sup>13</sup>C NMR (100 MHz) spectrum of probe **3** in d<sub>6</sub>-DMSO.

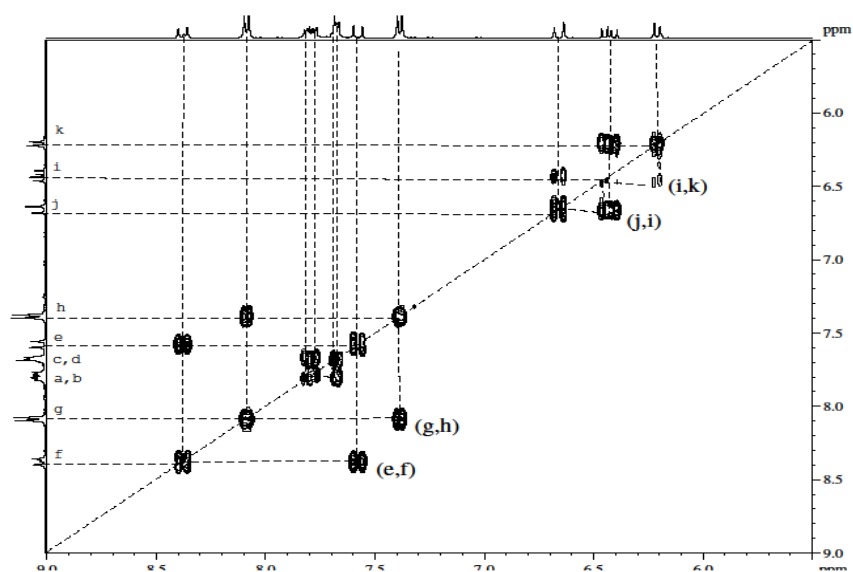

**Fig. S18.**  $^1\text{H}$  –  $^1\text{H}$  COSY NMR spectrum of probe **3** in  $\text{D}_2\text{O}/\text{CD}_3\text{OD}$  (1:1, V/V).

## Generic Display Report

### Analysis Info

Analysis Name D:\Data\YANGY\_MS\New\HANQINGXIN130529.d  
Method LOWmass.m  
Sample Name default  
Comment

Acquisition Date 5/29/2013 16:41:31

Operator ESQ6K  
Instrument esquire6000

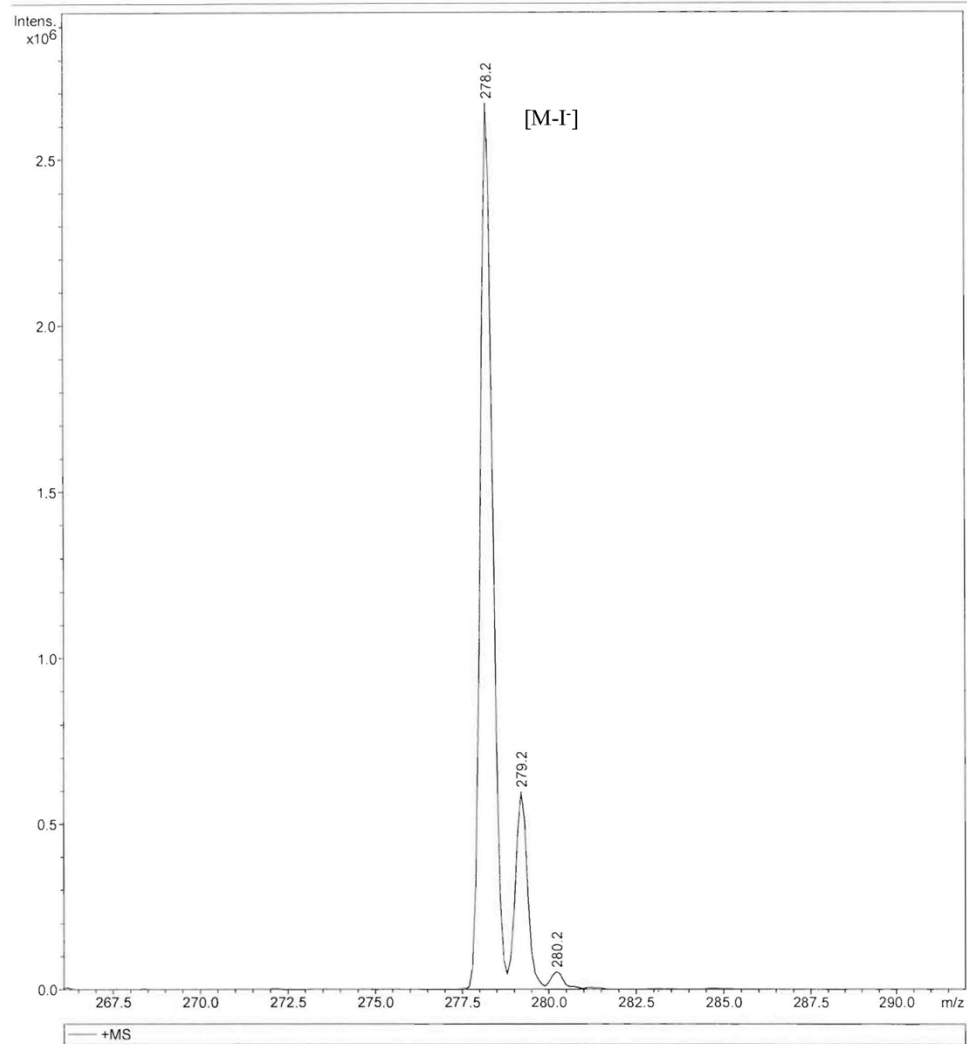

**Fig. S19.** Mass spectrum (ESI) of compound **2**.

## Generic Display Report

### Analysis Info

Analysis Name D:\Data\YANGY\_MS\New\HANQINGXIN130523.d  
Method LOWmass.m  
Sample Name default  
Comment

Acquisition Date 5/23/2013 16:39:10

Operator ESQ6K  
Instrument esquire6000

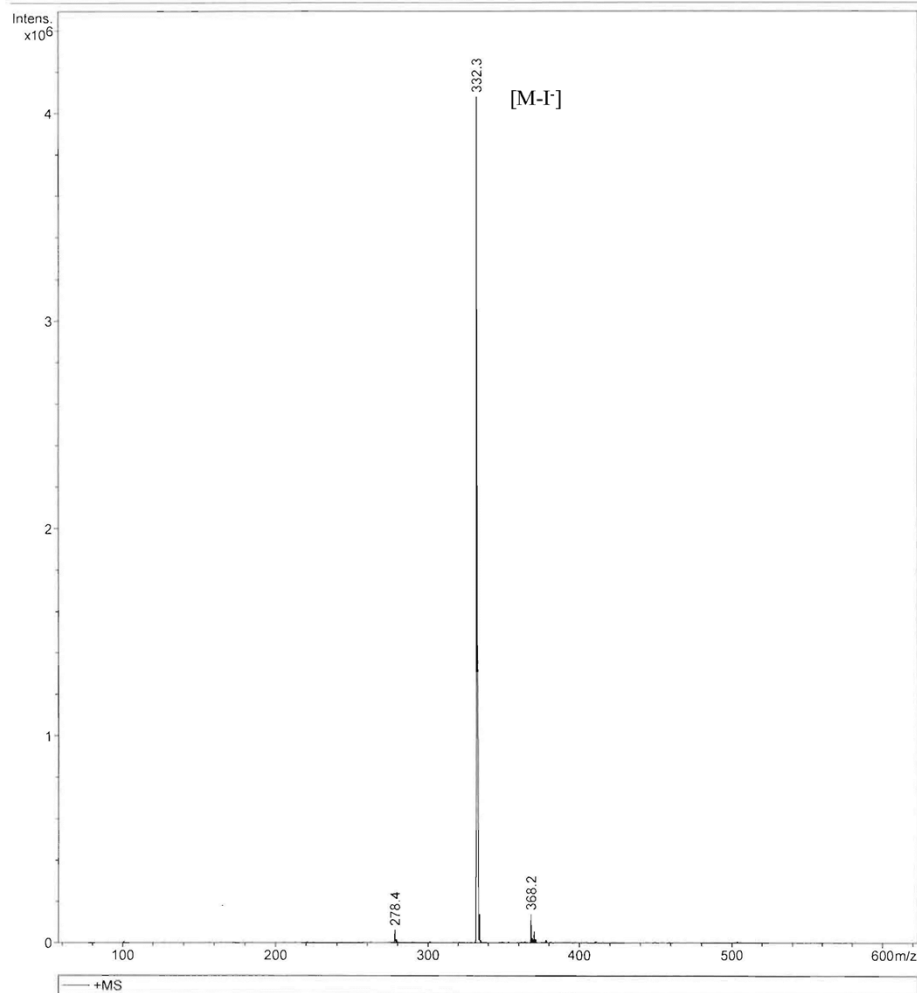

**Fig. S20.** Mass spectrum (ESI) of probe 3.

## Generic Display Report

### Analysis Info

Analysis Name D:\Data\YANGY\_MS\New\HANQINGXIN130527.d  
Method LOWmass.m  
Sample Name default  
Comment

Acquisition Date 5/27/2013 16:01:20

Operator ESQ6K  
Instrument esquire6000

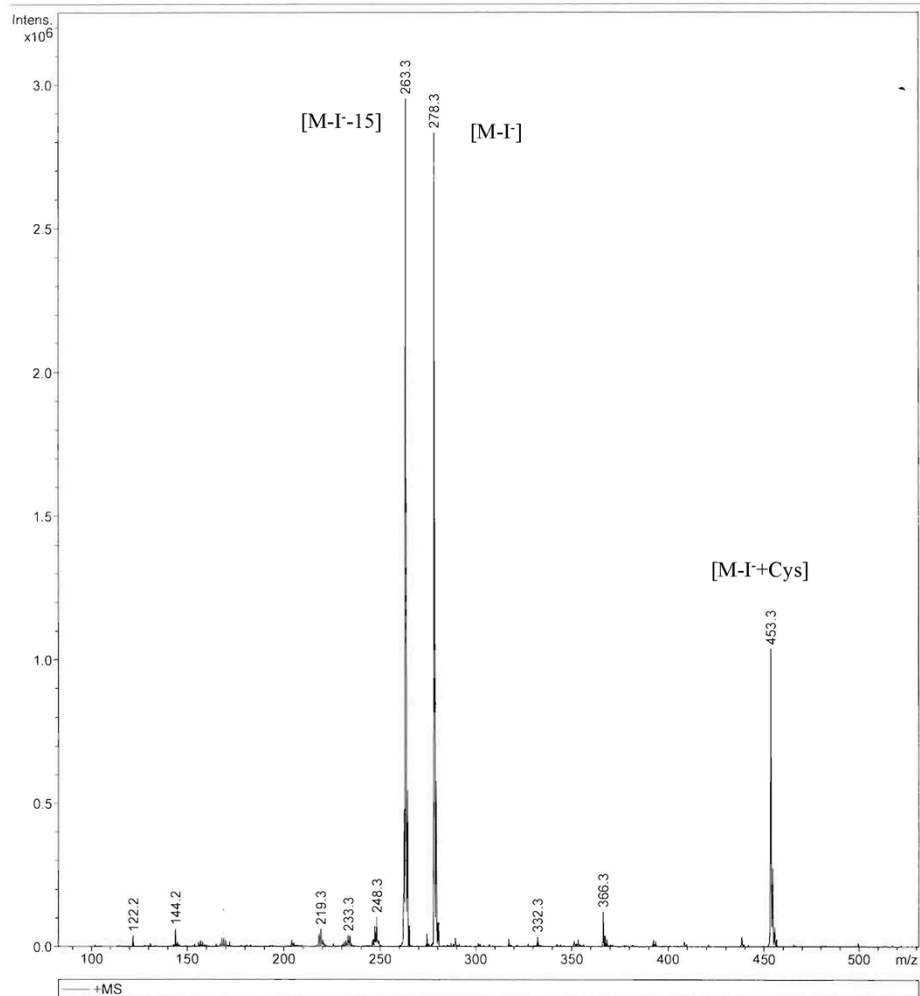

**Fig. S21.** Mass spectrum (ESI) obtained from the reaction of **4** with Cys.

## 样品信息

|       |                       |         |              |
|-------|-----------------------|---------|--------------|
| 样品名称: | W-N-3                 | 采集者:    | Breeze       |
| 样品类型: | 未知                    | 样品组名称:  |              |
| 瓶号:   | 1                     | 采集方法组:  | hanqx08      |
| 进样次数: | 12                    | 处理方法:   | W 3          |
| 进样体积: | 5.00 ul               | 通道名称:   | 384.0 纳米     |
| 运行时间: | 10.0 Minutes          | 处理通道注释: | PDA 384.0 纳米 |
| 采集时间: | 2014-4-9 15:15:18 CST |         |              |
| 处理时间: | 2014-4-9 15:35:45 CST |         |              |

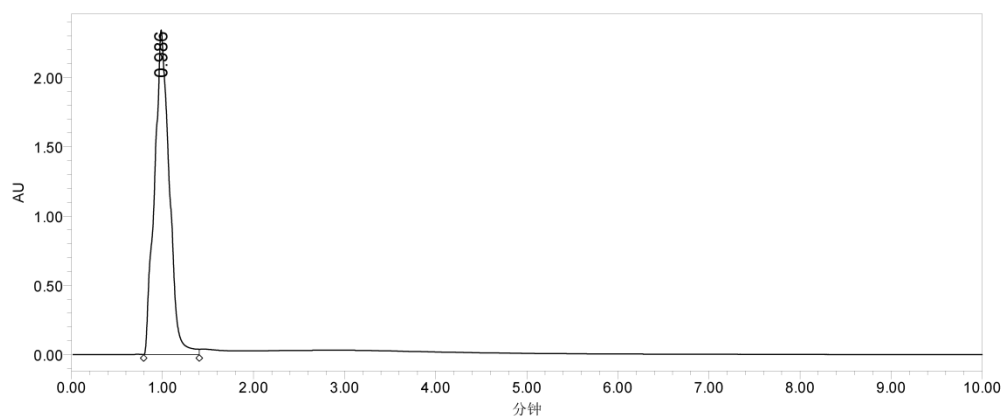

Channel: 2998; Channel Desc.: 2998 (380-390)纳米; Processing Method: W 3

名称:

|   | 通道说明             | 保留时间<br>(分钟) | 面积<br>(微伏*秒) | % 面积   | 高度<br>(微伏) |
|---|------------------|--------------|--------------|--------|------------|
| 1 | 2998 (380-390)纳米 | 0.986        | 26394307     | 100.00 | 2342097    |

Fig. S22. The retention measurements of probe 3 in water phase.

## 样品信息

|       |                       |         |              |
|-------|-----------------------|---------|--------------|
| 样品名称: | O-3                   | 采集者:    | Breeze       |
| 样品类型: | 未知                    | 样品组名称:  |              |
| 瓶号:   | 1                     | 采集方法组:  | hanqx08      |
| 进样次数: | 6                     | 处理方法:   | W 3          |
| 进样体积: | 5.00 ul               | 通道名称:   | 384.0 纳米     |
| 运行时间: | 10.0 Minutes          | 处理通道注释: | PDA 384.0 纳米 |
| 采集时间: | 2014-4-9 13:52:44 CST |         |              |
| 处理时间: | 2014-4-9 15:24:10 CST |         |              |

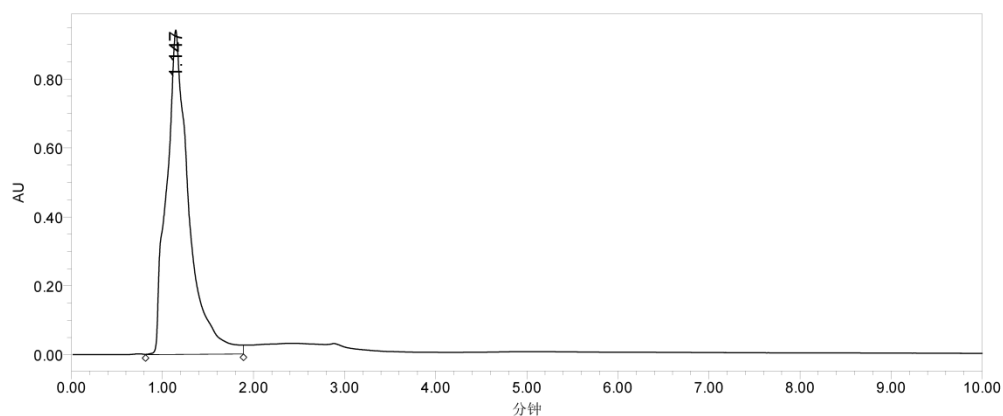

## 名称:

|   | 通道说明             | 保留时间<br>(分钟) | 面积<br>(微伏*秒) | % 面积   | 高度<br>(微伏) |
|---|------------------|--------------|--------------|--------|------------|
| 1 | 2998 (380-390)纳米 | 1.147        | 16067925     | 100.00 | 941487     |

Fig. S23. The retention measurements of probe 3 in octanol phase.
